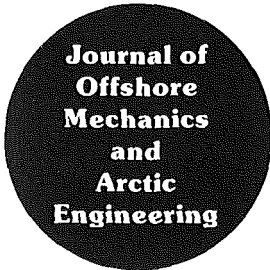

## Technical Editor's Page

On behalf of the board of Associate Editors and myself, I thank the following individuals for their contributions for the paper review process during the past year.

The papers submitted for publication in the *Journal of Offshore Mechanics and Arctic Engineering* are reviewed by at least three peers in the offshore and arctic community. The quality of JOMAE rests on the continued willingness of

referees to provide constructive and efficient reviews. This voluntary work of the reviewers, no doubt, improves the quality of the published paper in the Journal.

We always welcome new reviewers. Please submit your name and area of specialty to one of the Associate Editors if you want to volunteer your services as a reviewer.

A.L. Anderson  
S. Armbrust  
C.W. Bert  
D. Blanchet  
E.C. Brainard  
R. Bruschi  
I. Bryden  
B. Burke  
E.W. Carey  
J.-M. Chantrel  
H. Chong Rhee  
J.S. Chung  
S. Colbeck  
D.C. Cotter  
G.F.N. Cox  
R.A. Dalrymple  
J.F. Dalzell  
N. Daoud  
R. Dean  
J. Dempsey  
W.D. Dover  
P. Drews  
E.N. Earle  
C.P. Ellinas  
E.R. Funke  
H. Gaskill  
P. Gibson  
L.W. Gold  
R. Gordon  
W.P. Graebel  
J.M.R. Graham  
O.M. Griffin  
J. Guyt  
J. Halkyard  
S.Y. Hanna

W. Hansmann  
F.U. Hausler  
E. Hendricks  
E. Honza  
T.-M. Hsu  
R. Hudspeth  
M. Inoue  
E.R. Jefferys  
S.J. Jones  
J.J. Kollé  
A.H. Kuhne  
N.K. Lin  
B. Linfoot  
J. Lou  
C.H. Luk  
M. Maattanen  
H. Maeda  
J.R. Medina  
E.W. Miner  
J.P. Mizikos  
B. Molin  
S.R. Montgomery  
D.G. Morrison  
A. Murray  
A.M. Nawwar  
J. Niedzwecki  
T. Nomoto  
S. Nomura  
A. Papanikolaou  
J.H. Pattison  
D.A. Pecknold  
R.S. Pritchard  
T.D. Ralston  
D.M. Richards  
J. Richter-Menge

C.E. Rivero  
G. Rosenbusch  
P. Rogers  
K. Saito  
S. Sand  
T.J.O. Sanderson  
T. Sarpkaya  
E.M. Schulson  
L.H. Seidl  
K. Sekita  
J. Sharma  
N.K. Sinha  
P.-T.D. Spanos  
C.P. Sparks  
I. Stulemeijer  
B.M. Sumer  
Y. Takaishi  
R.E. Taylor  
R. Thompson  
G. Timco  
S. Toma  
M. Tomin  
A.L. Tunik  
N. Urabe  
J. Van Ryzin  
J.K. Vandiver  
S. Venkatesh  
J.H. Vugts  
H.T. Wang  
T. Wierzbicki  
G.A. Wilkens  
A.N. Williams  
F.M. Williams  
S. Wu  
D. Yue
